# Supplementary material for: Sol–gel conversion based on photoswitching between noncovalently and covalently linked netlike supramolecular polymers
Source: Royal Society of Chemistry journal article supplement (doi:10.1039/c3cc46297h), 2013-01-01
Supplement: c3cc46297h.pdf [file c3cc46297h.pdf]

## Electronic Supplementary Information

# Sol-gel Conversion Based on the Photo-switching between Noncovalently and Covalently Linked Netlike Supramolecular Polymers †

Qiwei Zhang, Da-Hui Qu, Xiang Ma\* and He Tian\*

*Key Laboratory for Advanced Materials and Institute of Fine Chemicals, East China University of Science & Technology, 130 Meilong Road, Shanghai 200237, P. R. China*

## Contents

|                                                               |    |
|---------------------------------------------------------------|----|
| 1. Materials, general procedures and syntheses. -----         | S2 |
| 2. Spectra on the self-assembled polymer <b>NNP</b> . -----   | S3 |
| 3. Spectra on the photochemistry of <b>NNP</b> . -----        | S6 |
| 4. Dynamic oscillatory measurement for <b>NNP</b> -sol. ----- | S7 |
| 5. References. -----                                          | S7 |
| 6. Additional spectra. -----                                  | S8 |

## 1. Materials, general procedures and syntheses

**1.1. Materials.** Unless stated otherwise, all reagents were purchased from Sigma-Aldrich or TCI Chemicals and used without further purification. Solvents were purified according to standard laboratory methods. The molecular structures were confirmed using  $^1\text{H}$  NMR,  $^{13}\text{C}$  NMR and high-resolution ESI mass spectroscopy.

**1.2. General.**  $^1\text{H}$  NMR spectra were measured on a Bruker AV-400 spectrometer.  $^{13}\text{C}$  and 2D ROESY NMR spectra were measured on a Bruker AV-500 spectrometer. The electronic spray ionization (ESI) high resolution mass spectra were tested on a HP 5958 mass spectrometer. DLS were measured on MALV RN, ZETA SIZER, Model ZEN3600, 25°C. AFM images were measured on Solver P47-PRO, NT-MDT. Elemental analysis were measured on a VARIO EL III. The sample was achieved by diluting the  $2.5 \times 10^{-1}$  M solution to  $1.0 \times 10^{-4}$  M in water, calculated from the monomer **4**, and spin-coated on a mica plate. The photoirradiation was carried on a UV lamp of 6 W in a 1 mm  $\times$  1 cm quartz cell. The distance between the lamp and the sample cell was 1 cm. Photostationary states were ensured by taking UV spectra at distinct intervals until no changes in absorbance were observed.

### 1.3. Syntheses

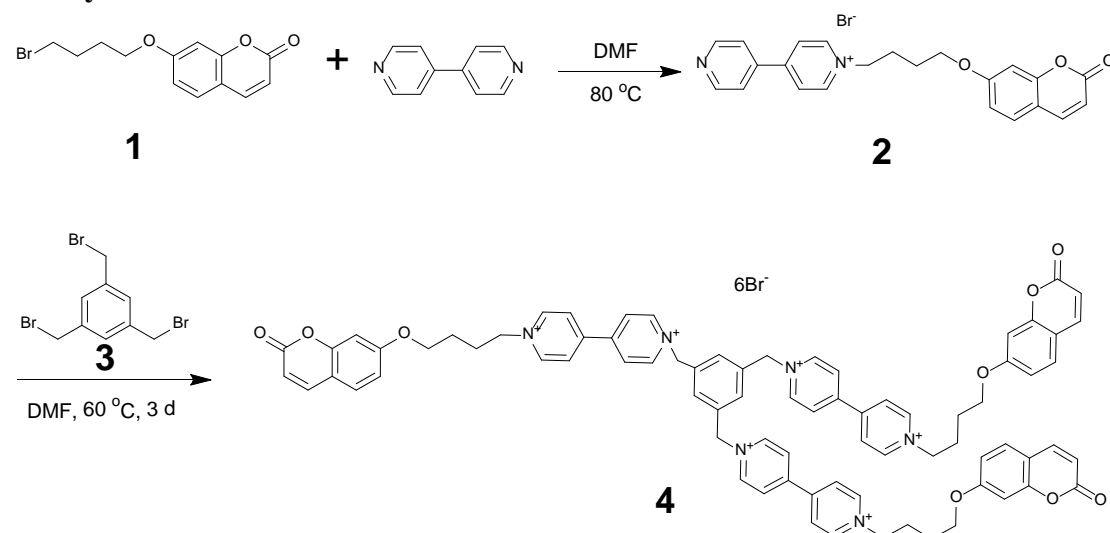

**7-(4-bromobutoxy)-2H-chromen-2-one (1).** This compound was synthesized conveniently in one step from commercial materials 7-hydroxyl coumarin and 1,4-dibromobutane according to literature procedure.<sup>1</sup>

**1-(4-((2-oxo-2H-chromen-7-yl)oxy)butyl)-[4,4'-bipyridin]-1-ium bromide (2).** Compound **1** (3 g, 10.1 mmol, 1 eq) and 4,4'-bipyridine 7.91g (50.7 mmol, 5eq) were dissolved in 80 mL DMF. The solution was stirred at 80 °C under argon for 12 h and cooled to room temperature. The reaction solution was then poured into 200 mL ethyl acetate. The precipitate was collected by filtration and washed with ethyl acetate and dried in vacuo to provide compound **2** as pale yellow powder (4.32 g, 94 % yield), m.p. 246.7-247.2 °C.  $^1\text{H}$  NMR (400 MHz, DMSO-*d*<sub>6</sub>)  $\delta$  9.28 (d, *J* = 6.8 Hz, 2H), 8.94 – 8.84 (d, *J* = 6.1 Hz, 2H), 8.66 (d, *J* = 6.8 Hz, 2H), 8.04 (dd, *J* = 4.6, 1.5 Hz, 2H), 7.99 (d, *J* = 9.5 Hz, 1H), 7.63 (d, *J* = 8.6 Hz, 1H), 6.99 (d, *J* = 2.3 Hz, 1H), 6.94 (dd, *J* = 8.6, 2.4 Hz, 1H), 6.29 (d, *J* = 9.5 Hz, 1H), 4.73 (t, *J* = 7.2 Hz, 2H), 4.14 (t, *J* = 6.2 Hz, 2H), 2.20 – 2.10 (m, 2H), 1.85 – 1.75 (m, 2H).  $^{13}\text{C}$  NMR (125 MHz, DMSO-*d*<sub>6</sub>)

$\delta$ 161.54, 160.24, 155.33, 152.25, 150.96, 145.36, 144.29, 140.81, 129.50, 125.41, 121.89, 112.69, 112.47, 112.36, 101.20, 67.58, 59.95, 27.50, 25.00. HRMS (ESI) (m/z):  $[M-Br]^+$  calcd for  $C_{23}H_{21}N_2O_3^+$ , 373.1547; found, 373.1550. Elem Anal. calcd for  $C_{23}H_{21}O_3N_2Br$ : C 61.05, H 4.68, N 6.19. Found: C 60.95, H 4.56, N 6.12.

**1,3,5-tris(bromomethyl)benzene (3)**. This compound was synthesized conveniently in one step from commercial materials mesitylene and N-bromosuccinimide according to literature procedure.<sup>2</sup>

**1',1''',1''''-(benzene-1,3,5-triyltris(methylene))tris(1-(4-((2-oxo-2H-chromen-7-yl)oxy)butyl)-[4,4'-bipyridine]-1,1'-diium) (4)**. Compound **2** (2 g, 4.4 mmol, 3.3 eq) and Compound **3** (0.47g 1.3 mmol, 1eq) were dissolved in 60 mL DMF. The solution was stirred at 80 °C under argon for 3 days and cooled to room temperature. The precipitate was collected by filtration and washed with a small amount of DMF and dried in vacuo to provide crude compound **2**, which was then recrystallized with EtOH/H<sub>2</sub>O to get the pale yellow powder (1.17 g, 51% yield), m.p. 257.9-259.7 °C. <sup>1</sup>H NMR (500 MHz, D<sub>2</sub>O)  $\delta$  9.11 (d, J = 6.8 Hz, 6H), 9.00 (d, J = 6.8 Hz, 6H), 8.36 (d, J = 6.7 Hz, 6H), 8.31 (d, J = 6.6 Hz, 6H), 7.78 (s, 3H), 7.53 (d, J = 9.4 Hz, 3H), 7.25 (d, J = 8.7 Hz, 3H), 6.67 (dd, J = 8.7, 2.3 Hz, 3H), 6.37 (d, J = 2.1 Hz, 3H), 5.88 (s, 6H), 5.55 (d, J = 9.4 Hz, 3H), 4.65 (m, 6H), 3.90 (t, J = 5.8 Hz, 6H), 2.21 – 2.13 (m, 6H), 1.82 – 1.69 (m, 6H). <sup>13</sup>C NMR (125 MHz, D<sub>2</sub>O)  $\delta$  163.74, 161.22, 154.48, 149.79, 149.11, 145.62, 145.59, 143.86, 134.38, 134.01, 129.93, 129.59, 127.04, 126.72, 113.25, 112.59, 111.25, 101.24, 67.39, 62.81, 61.91, 26.84, 24.60. HRMS (ESI) (m/z):  $[M-6Br]^{6+}/6$  calcd for  $[C_{78}H_{72}N_6O_9]^{6+}/6$ , 206.0888; found, 206.0883. Elem Anal. calcd for  $C_{78}H_{72}O_9N_6Br_6$ : C 54.74, H 4.24, N 4.91. Found: C 54.63, H 4.16, N 4.76.

## 2. Spectra on the self-assembled polymer NNP.

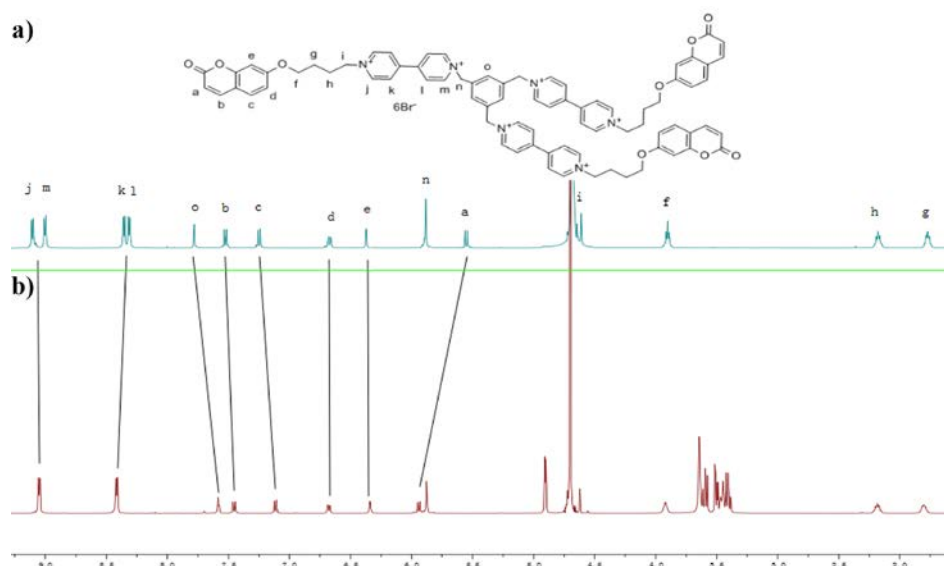

Fig. S1 <sup>1</sup>H NMR spectra of a) **4** and b) **4**@ $\gamma$ -CD complex (NNP) (1:1.5 molar ratio, 8 mM), D<sub>2</sub>O, 25 °C.

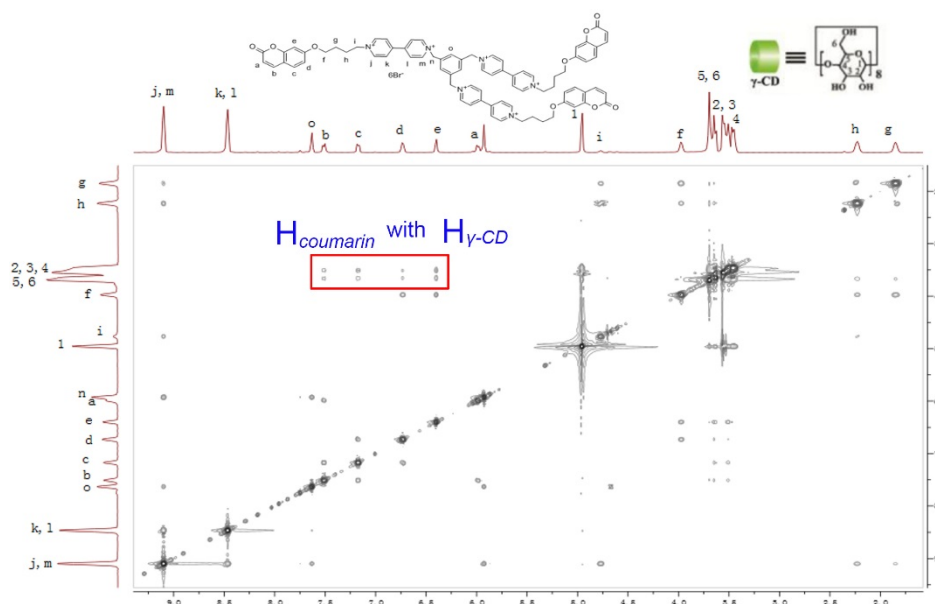

Fig. S2 2D ROESY NMR spectrum of **4**@ $\gamma$ -CD complex (**NNP**) ( $[\mathbf{4}]_{\text{mol}}:[\gamma\text{-CD}]_{\text{mol}}=1:1.5$ , 8 mM),  $\text{D}_2\text{O}$ , 25 °C.

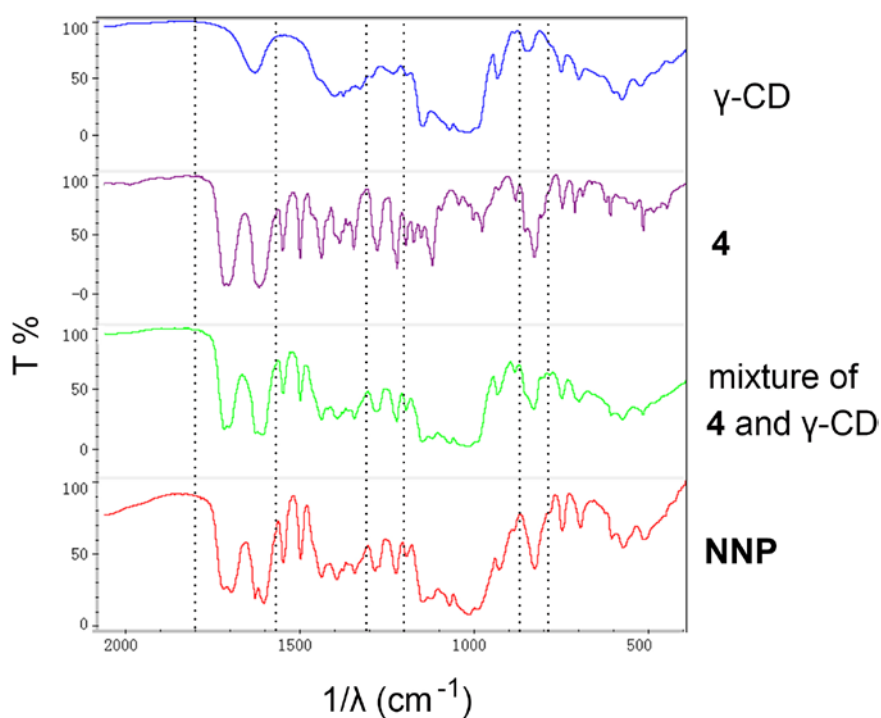

Fig. S3 The FT-IR absorbance spectra of  $\gamma$ -CD, **4**, their mixture (gained by simply mixing **4** and  $\gamma$ -CD in solid state and grinding), and the inclusion complex **NNP** (obtained by removing the solvent of **NNP** solution under reduced pressure), 25 °C.

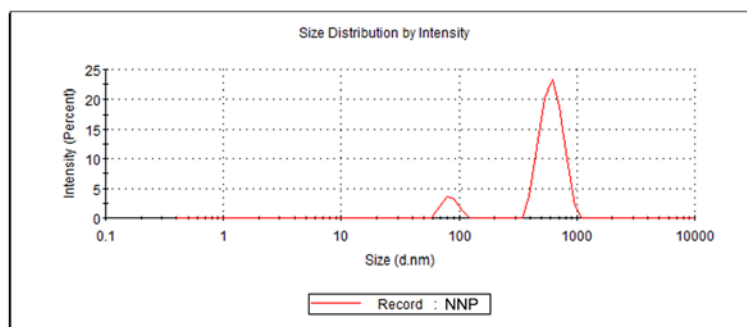

Fig. S4 DLS result of **NNP** aqueous solution (0.1 mM, calculated from the repeat units), 25 °C.

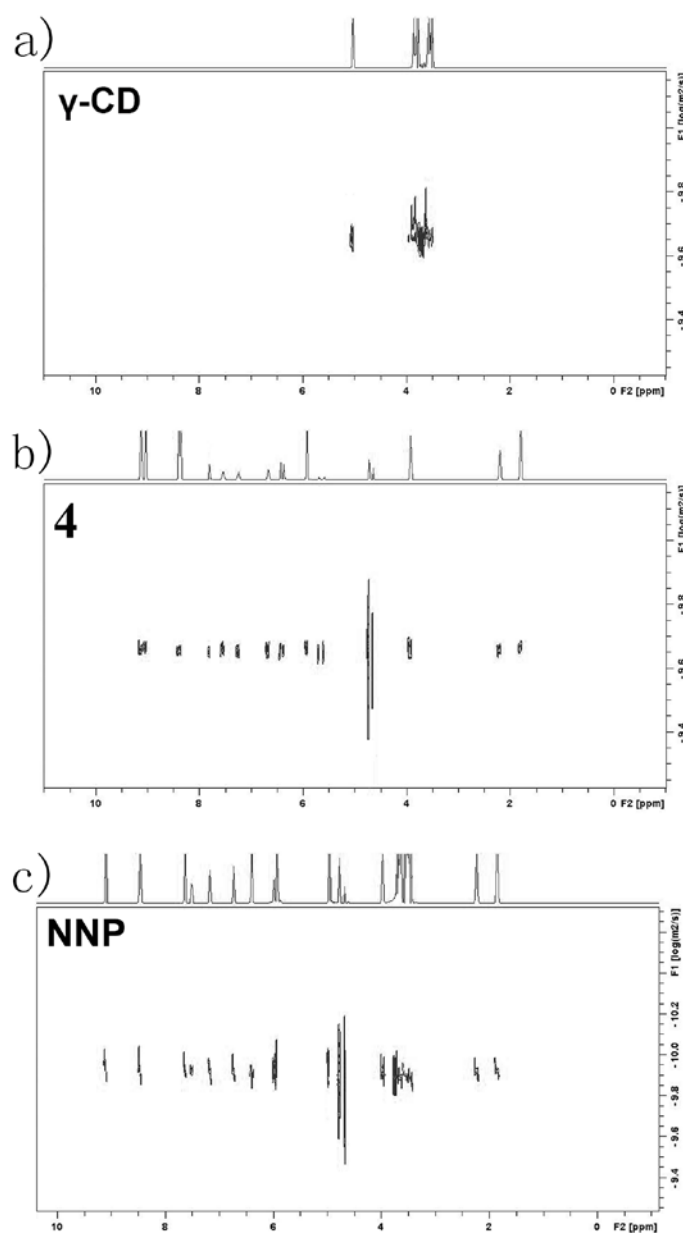

Fig. S5 DOSY NMR spectra of (a)  $\gamma$ -CD, (b) monomer **4** and (c) **NNP**, ([**4**]<sub>mol</sub>:[ $\gamma$ -CD]<sub>mol</sub>=1:1.5, 10 mM), D<sub>2</sub>O, 25 °C.

### 3. Spectra on the photochemistry of NNP.

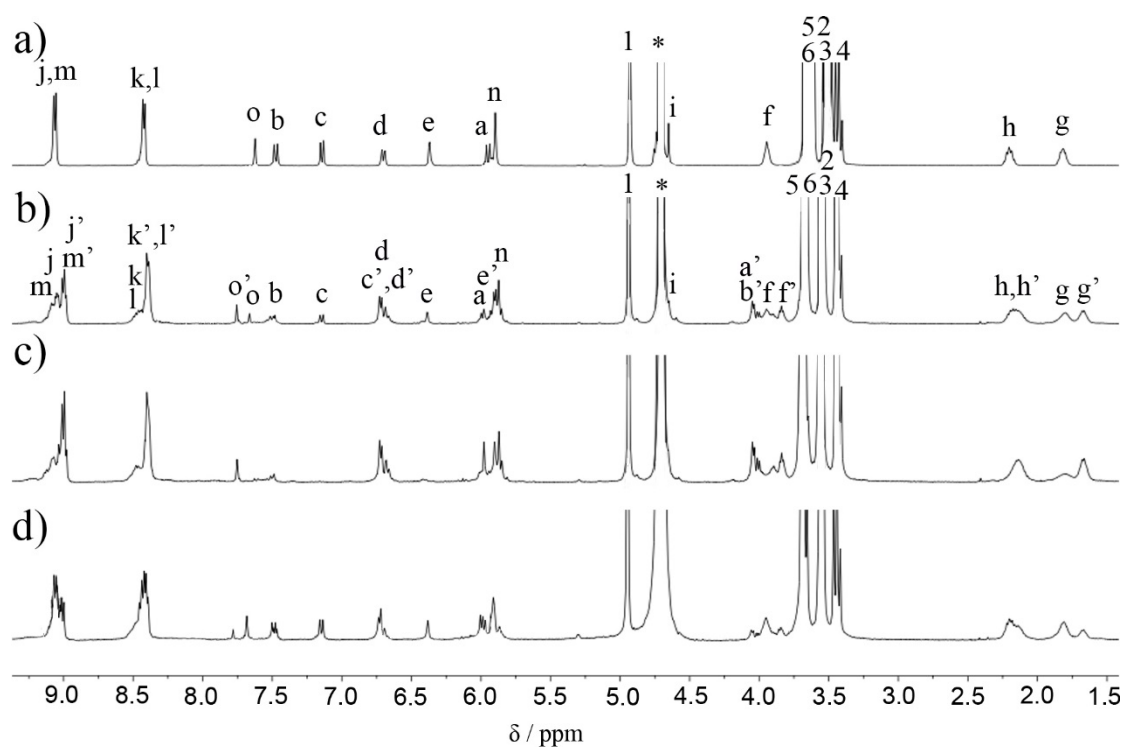

Fig. S6 Partial  $^1\text{H}$  NMR spectra (400 MHz,  $\text{D}_2\text{O}$ , 25 °C) of NNP solution irradiated with 365 nm UV light, (a) 0 h, (b) 6 h, (c) 12 h, (d) 365 nm for 12 h, and then 254 nm for 18 h. The peaks marked with asterisk correspond to  $\text{H}_2\text{O}$ .

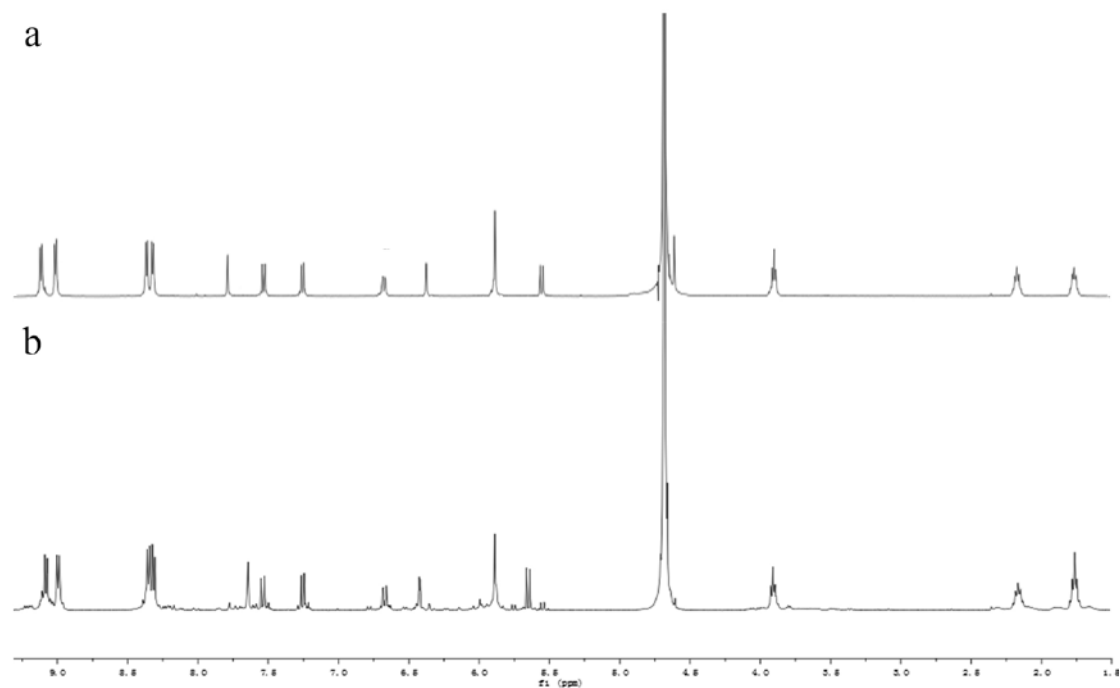

Fig. S7 Partial  $^1\text{H}$  NMR spectra (400 MHz,  $\text{D}_2\text{O}$ , 25 °C) of 4 solution (8 mM, 0.5 mL) (a) before and (b) after irradiation with 365 nm UV light for 12 h.

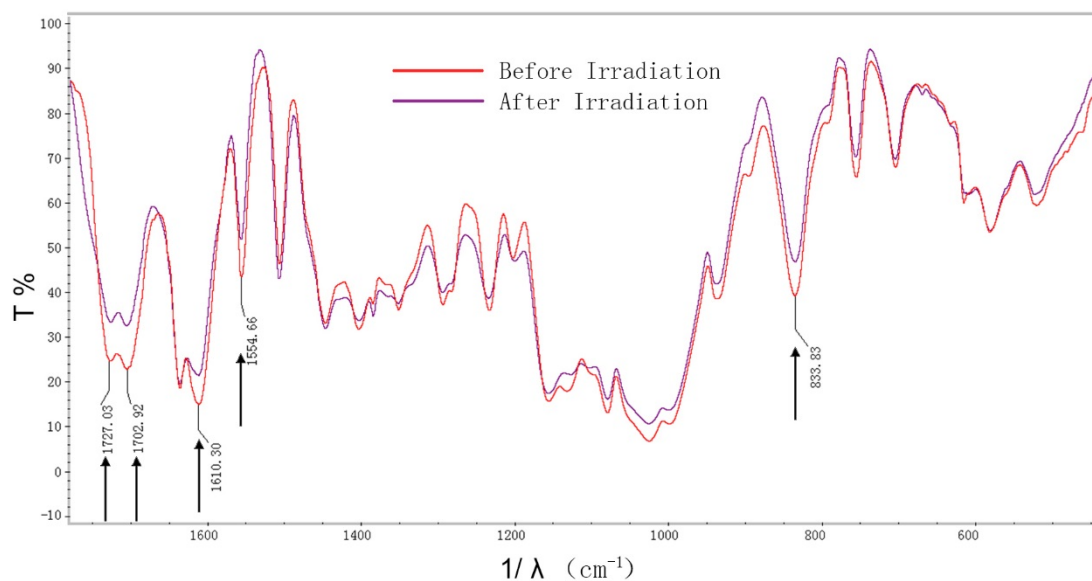

Fig. S8 FT-IR spectra of the complex **4**@ $\gamma$ -CD before (**NNP**) and after (**CNP**) irradiation at 365nm UV light.

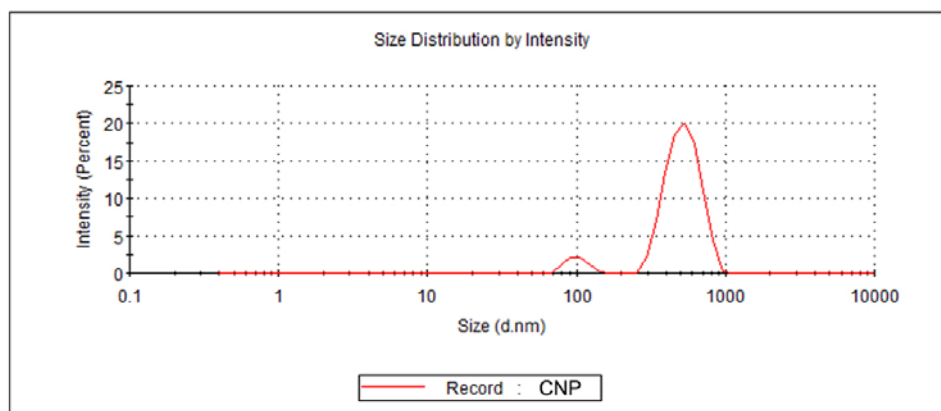

Fig. S9 DLS result of **CNP** aqueous solution (obtained from 2 mL **NNP** solution, 5 mM, calculated from the repeat units and irradiated by 365 nm UV light for 12 h and diluted to 0.1 mM), 25 °C.

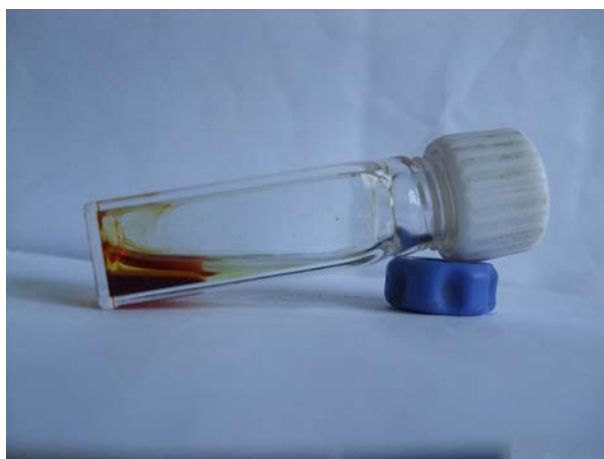

Fig. S10 Photographic representation of the sample obtained from irradiation with 365 nm UV light for solution **4** ( $2.5 \times 10^{-1}$  M, 300  $\mu$ L, 15  $^{\circ}$ C). (Though high concentration might, to some extent, facilitate the intermolecular photo-dimerization of **4**, the conversion is still inefficient under this experimental condition to form a large enough network without  $\gamma$ -CD. Additionally, because of the decrease of the solubility, the compound **4** aqueous solution separated to two layers after photo-irradiation. So we confirmed that  $\gamma$ -CDs are essential to form the dual-responsive hydrogel in our experimental condition.)

#### 4. Dynamic oscillatory measurement for NNP-sol.

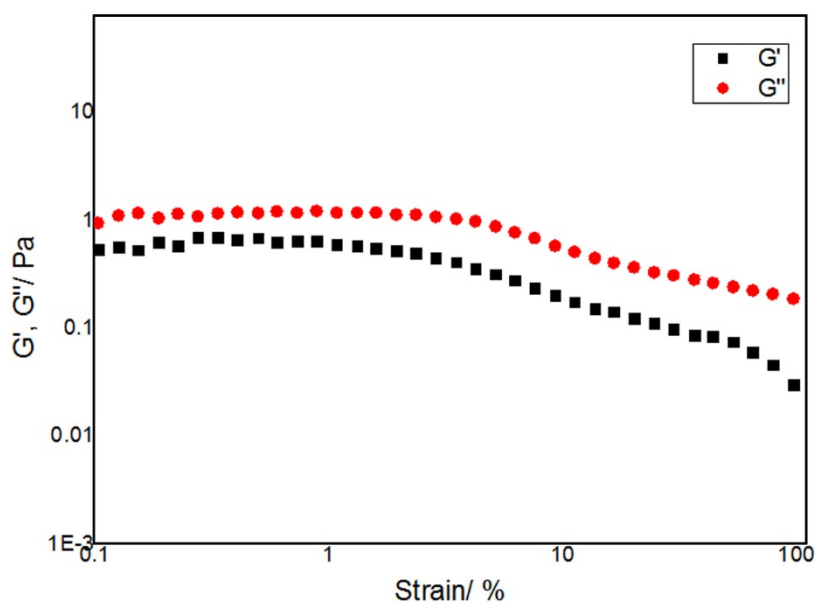

Fig. S11 Dynamic oscillatory data for **CNP**-gel irradiated by 254 nm UV light for five days, on strain sweep at a frequency of 1  $\text{rad s}^{-1}$  (15  $^{\circ}$ C).



## 5. References

1. Q. Zhang, D.-H. Qu, J. Wu, X. Ma, Q. Wang and H. Tian, *Langmuir*, 2013, **29**, 5345.
2. F. Qiu, C. Tu, Y. Chen, Y. Shi, L. Song, R. Wang, X. Zhu, B. Zhu, D. Yan and T. Han, *Chem. –Eur. J.*, 2010, **16**, 12710.

## 6. Additional spectra.

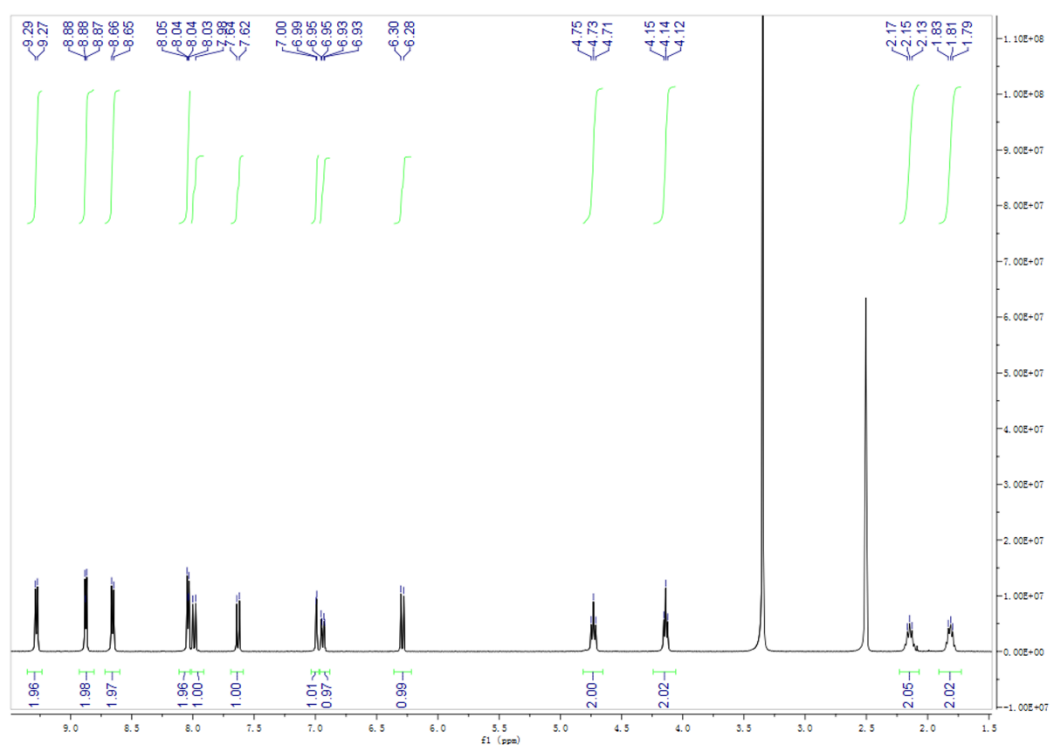

$^1\text{H}$  NMR of compound **2**,  $\text{DMSO-}d_6$ ,  $25\text{ }^\circ\text{C}$

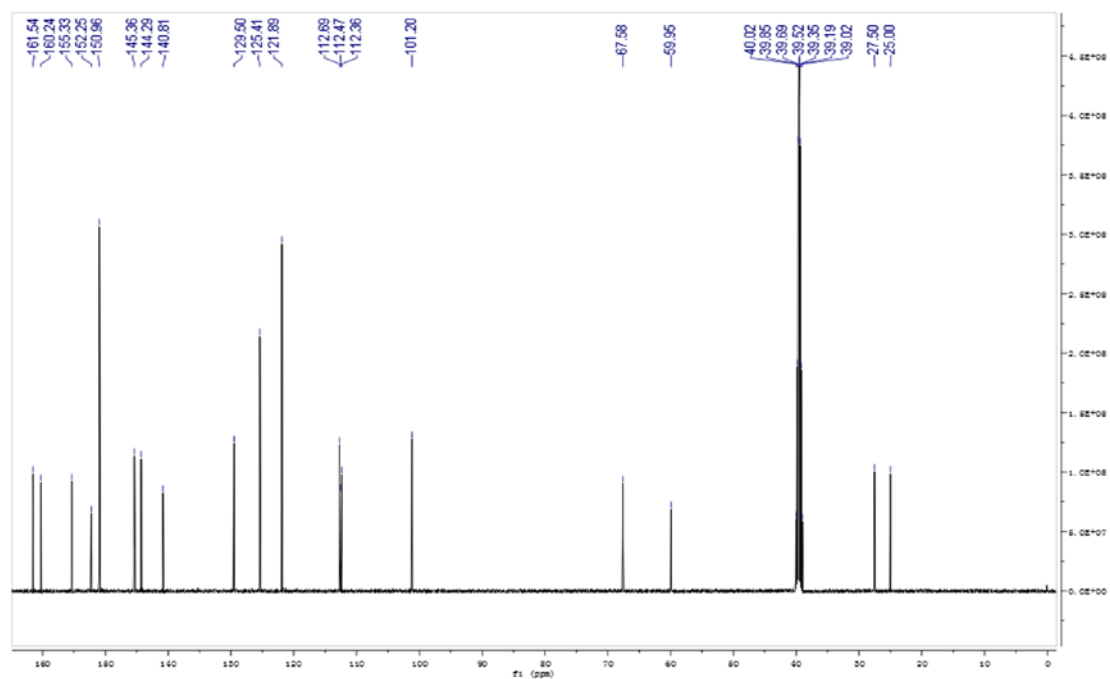

$^{13}\text{C}$  NMR of compound **2**,  $\text{DMSO-}d_6$ ,  $25\text{ }^\circ\text{C}$

**Single Mass Analysis**

Tolerance = 30.0 mDa / DBE: min = -1.5, max = 100.0

Element prediction: Off

Number of isotope peaks used for i-FIT = 2

Monoisotopic Mass, Even Electron Ions

23 formula(e) evaluated with 2 results within limits (up to 1 best isotopic matches for each mass)

Elements Used:

C: 0-25 H: 0-50 N: 0-2 O: 0-3

H-TIAN

ECUST institute of Fine Chem

19-Jul-2013

16:27:23

1: TOF MS ES+

1.13e+004

TH-QW-BC 117 (0.812) Cm (114:119)

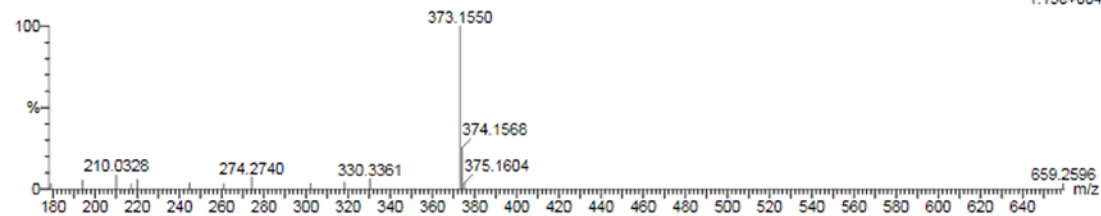

Minimum:

Maximum: 30.0 50.0 -1.5

| Mass     | Calc. Mass | mDa  | PPM  | DBE  | i-FIT | i-FIT (Norm) | Formula       |
|----------|------------|------|------|------|-------|--------------|---------------|
| 373.1550 | 373.1552   | -0.2 | -0.5 | 14.5 | 10.0  | 0.0          | C23 H21 N2 O3 |

ESI-MS of compound **2**

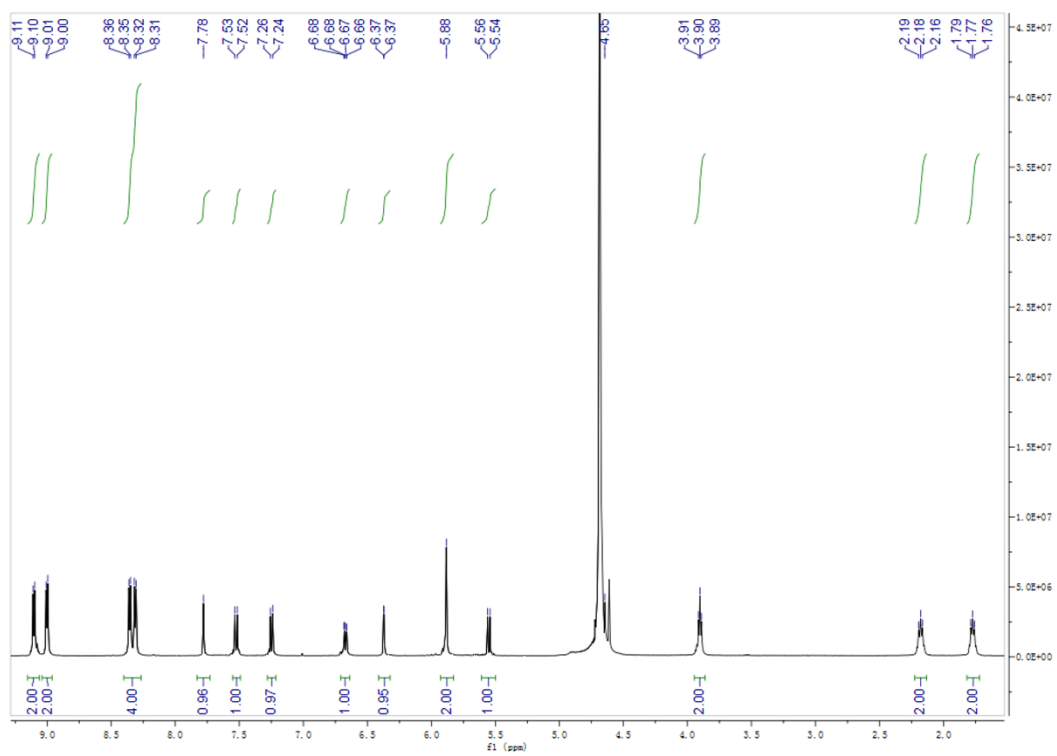

$^1\text{H}$  NMR of compound 4,  $\text{D}_2\text{O}$ , 25 °C

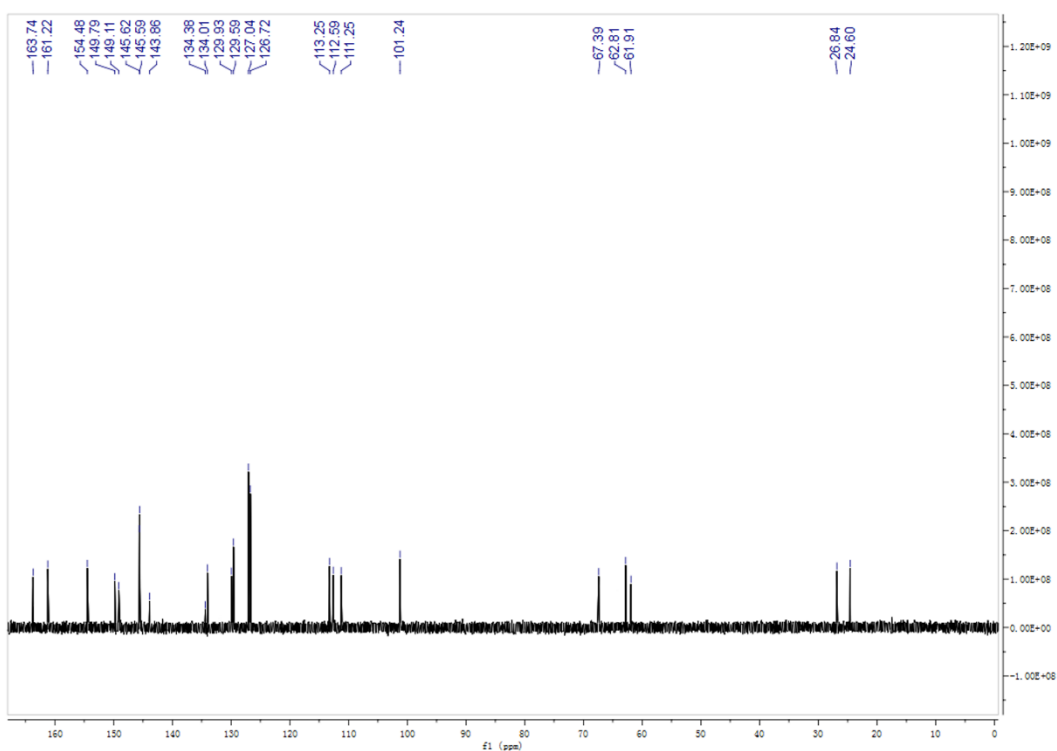

$^{13}\text{C}$  NMR of compound 4,  $\text{D}_2\text{O}$ , 25 °C

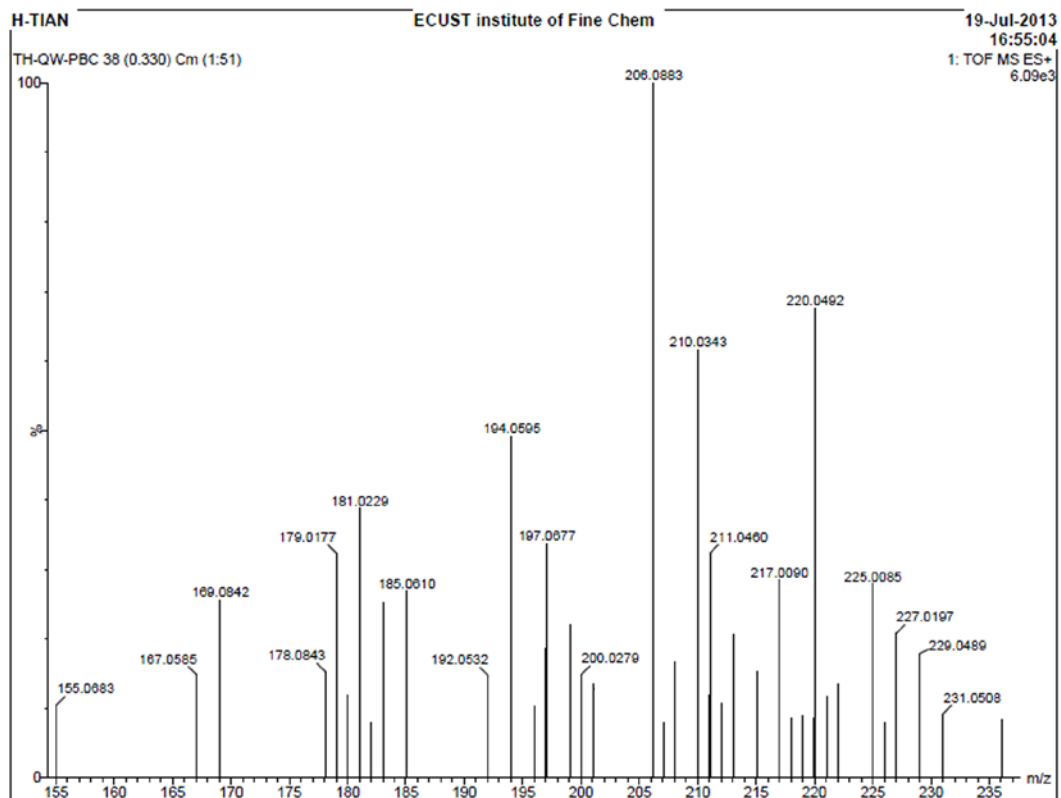

ESI-MS of compound 4
